# Supplementary material for: Identification of novel exonic mobile element insertions in epithelial ovarian cancers
Source: PubMed Central journal article supplement — Hum Genome Var. 2015 Oct 1;2:15030–. doi: 10.1038/hgv.2015.30 (PMC4785551; doi:10.1038/hgv.2015.30), 2015-10-01
Supplement: hgv201530-s3.pdf [file hgv201530-s3.pdf]

|                         |                 |                         |
|-------------------------|-----------------|-------------------------|
| 94°C                    | 1 min           | } 10 cycles (touchdown) |
| 98°C                    | 10 sec          |                         |
| 60°C→55°C(-0.5°C/cycle) | 15 sec          |                         |
| 68°C                    | 30 sec or 1 min |                         |
| 98°C                    | 10 sec          | } 25 cycles             |
| 55°C                    | 15 sec          |                         |
| 68°C                    | 30 sec or 1 min |                         |

**Text S1.** Touch down PCR protocol. In the 10 cycles of touchdown step, annealing temperature decrease 0.5°C in every cycle and sift from 60°C to 55°C. For the extension steps, we used 30 sec or 1 min depends on inserted ME (*A/u* or L1), respectively.
