# Supplementary material for: Identification of novel exonic mobile element insertions in epithelial ovarian cancers
Source: PubMed Central journal article supplement — Hum Genome Var. 2015 Oct 1;2:15030–. doi: 10.1038/hgv.2015.30 (PMC4785551; doi:10.1038/hgv.2015.30), 2015-10-01
Supplement: hgv201530-s4.pdf [file hgv201530-s4.pdf]

| Chr | Insertion Point | Gene           | Sample | Total read | Split hits | Allelic fraction |
|-----|-----------------|----------------|--------|------------|------------|------------------|
| 1   | 149939291       | <i>OTUD7B</i>  | S004   | 243        | 9          | 0.0370           |
| 5   | 176918034       | <i>PDLIM7</i>  | S011   | 84         | 5          | 0.0595           |
| 8   | 55540494        | <i>RP1</i>     | S271   | 80         | 2          | 0.0250           |
| 8   | 71593525        | <i>XKR9</i>    | S005   | 269        | 11         | 0.0409           |
| 8   | 118183382       | <i>SLC30A8</i> | S031   | 240        | 6          | 0.0250           |
| 8   | 145694721       | <i>KIFC2</i>   | S117   | 40         | 2          | 0.0500           |
| 9   | 125486418       | <i>OR1L4</i>   | S068   | 299        | 2          | 0.0067           |
| 14  | 24655945        | <i>IPO4</i>    | S008   | 115        | 5          | 0.0435           |

**Table S2.** Allelic fraction of eight somatic exonic MEIs. “Total read” column shows number of total reads spanning insertion point. “Split hits” column shows number of split reads supporting MEI. Allelic fraction column shows values of “Split hits / Total read”.
